# Supplementary material for: Transcriptional and immunohistological assessment of immune infiltration in pancreatic cancer
Source: PubMed Central journal article supplement (PMC7458344; doi:10.1371/journal.pone.0238380), 2020-08-31
Supplement: pone.0238380.s003.pdf [file pone.0238380.s003.pdf]

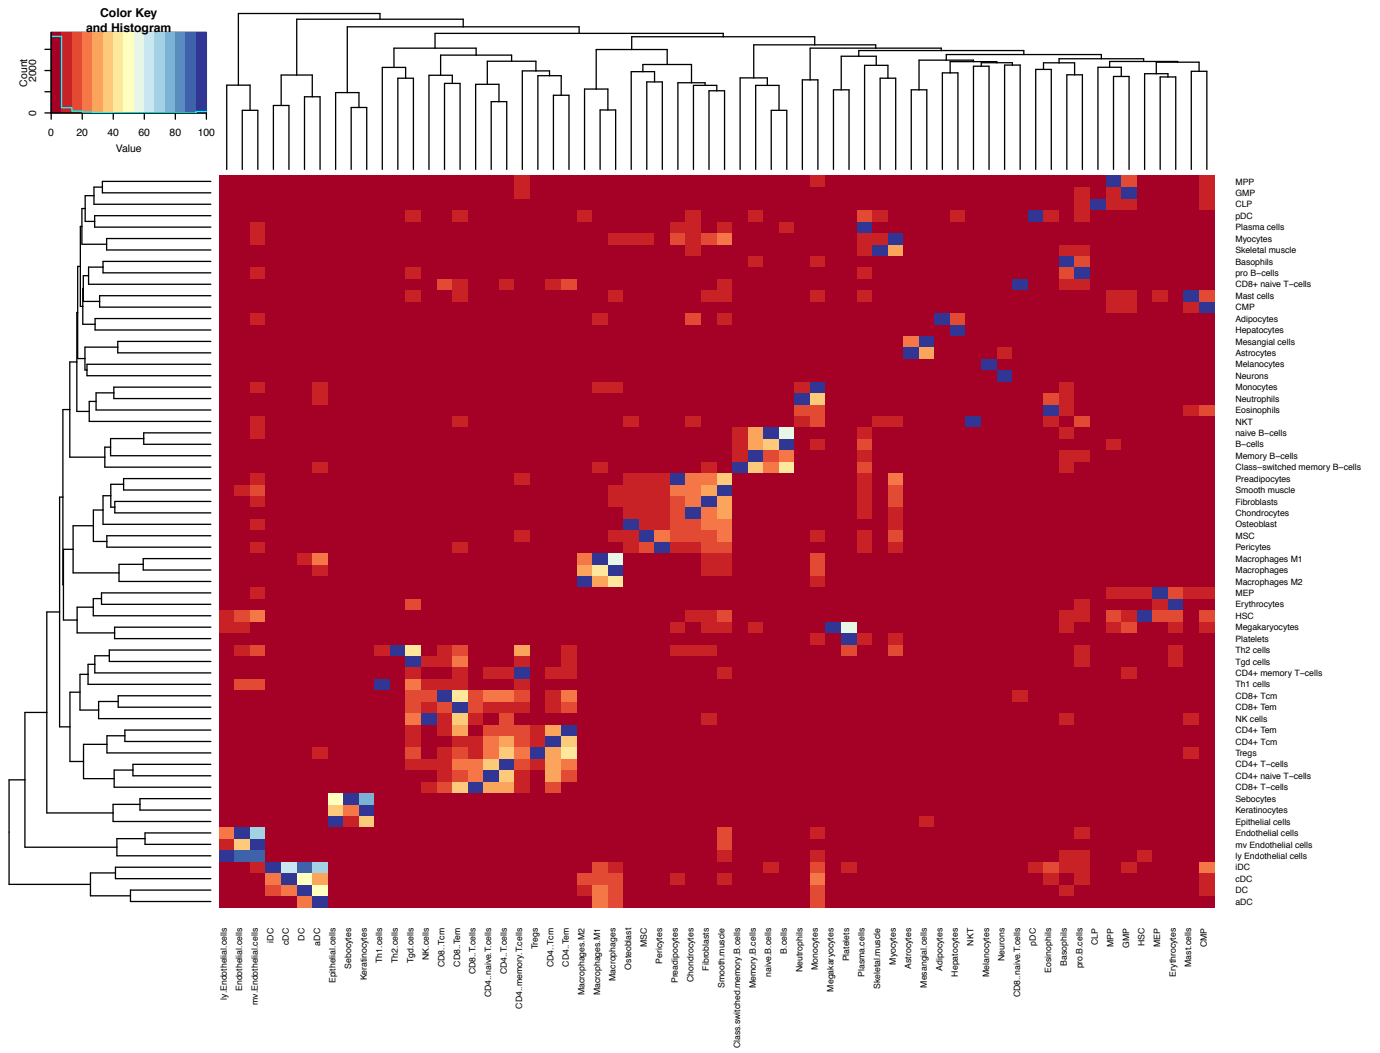

**Supplementary Figure 2.** Heatmap showing percent match between genes used in xCell gene signature for each defined cell type.
